# Supplementary material for: Inner-nuclear-membrane–associated degradation employs Dfm1-independent retrotranslocation and alleviates misfolded transmembrane-protein toxicity
Source: PubMed Central journal article supplement — Mol Biol Cell. 2021 Apr 1;32(7):521–37. doi: 10.1091/mbc.E20-11-0720 (PMC8101470; doi:10.1091/mbc.e20-11-0720), 2021-04-01
Supplement: mbc-32-521-s001.pdf [file mbc-32-521-s001.pdf]

# Supplemental Materials

*Molecular Biology of the Cell*

Flagg et al.

## YPD Day 2

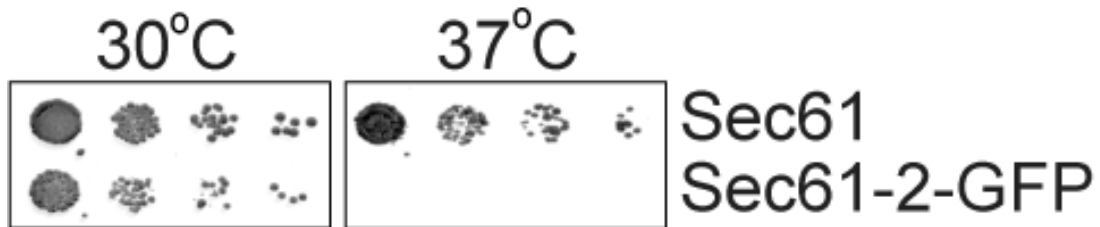

**Supplemental Figure One:** *sec61-2-GFP* causes temperature sensitivity.

WT cells and cells with *sec61-2-GFP* integrated at the endogenous *SEC61* locus were monitored for growth by dilution assay. 5-fold dilutions of each strain were spotted onto YPD, then the cells were grown at the indicated temperatures and imaged at the indicated time.
